# Supplementary material for: A magnetic nanoscale metal–organic framework (MNMOF) as a viable fluorescence quencher material for ssDNA and for the detection of mercury ions via a novel quenching–quenching mechanism
Source: Royal Society of Chemistry journal article supplement (doi:10.1039/c9ra08274c), 2020-01-01
Supplement: c9ra08274c1.pdf [file c9ra08274c1.pdf]

## Electronic supporting information

Magnetize Nanoscale Metal-Organic Framework (MNMOFs) as a viable fluorescent quencher material for ssDNA based on a Novel Quenching-Quenching mechanism for detection of mercury ions

Muppudathi Marieeswaran, Perumal Panneerselvam \*

\* Department of Chemistry, SRM Institute of Science and Technology, Kattankulathur

603 203, Tamil Nadu, India

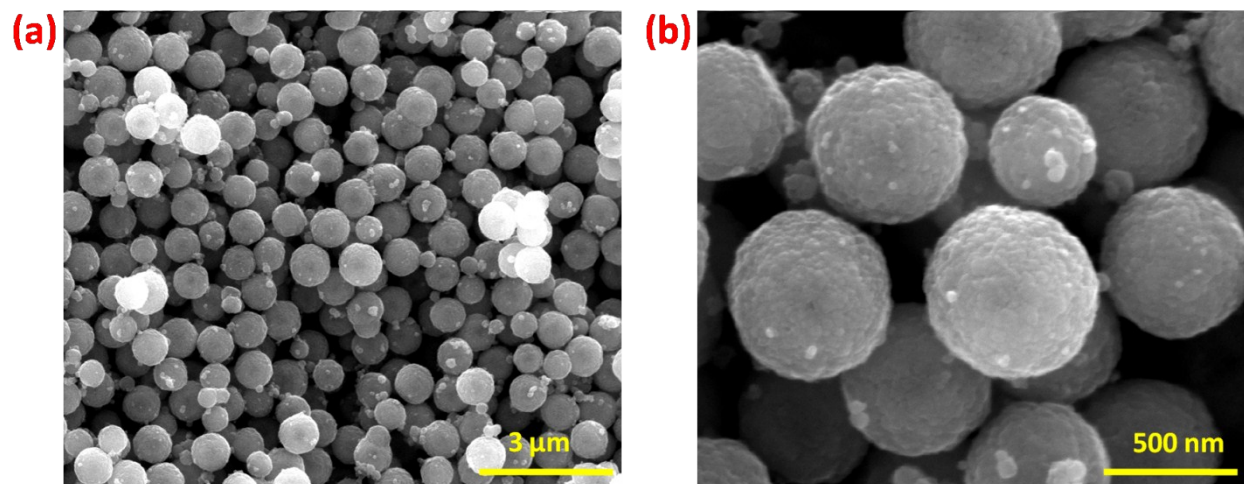

Fig.S1 (a,b) SEM Images  $\text{Fe}_3\text{O}_4$  NPs

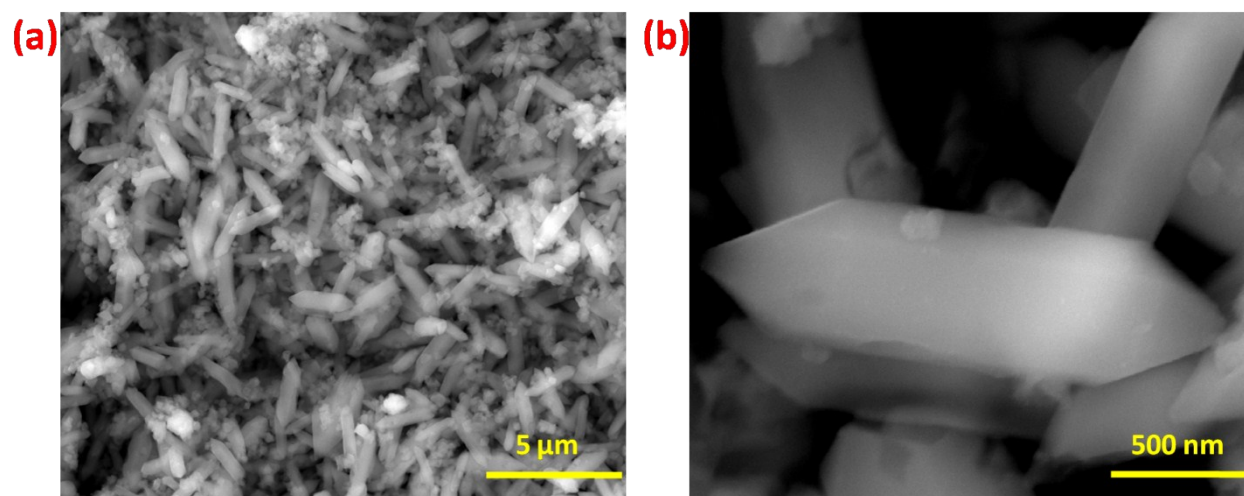

Fig.S2 (a,b) SEM Images MIL-101- $\text{NH}_2$  by hydrothermal method synthesis method

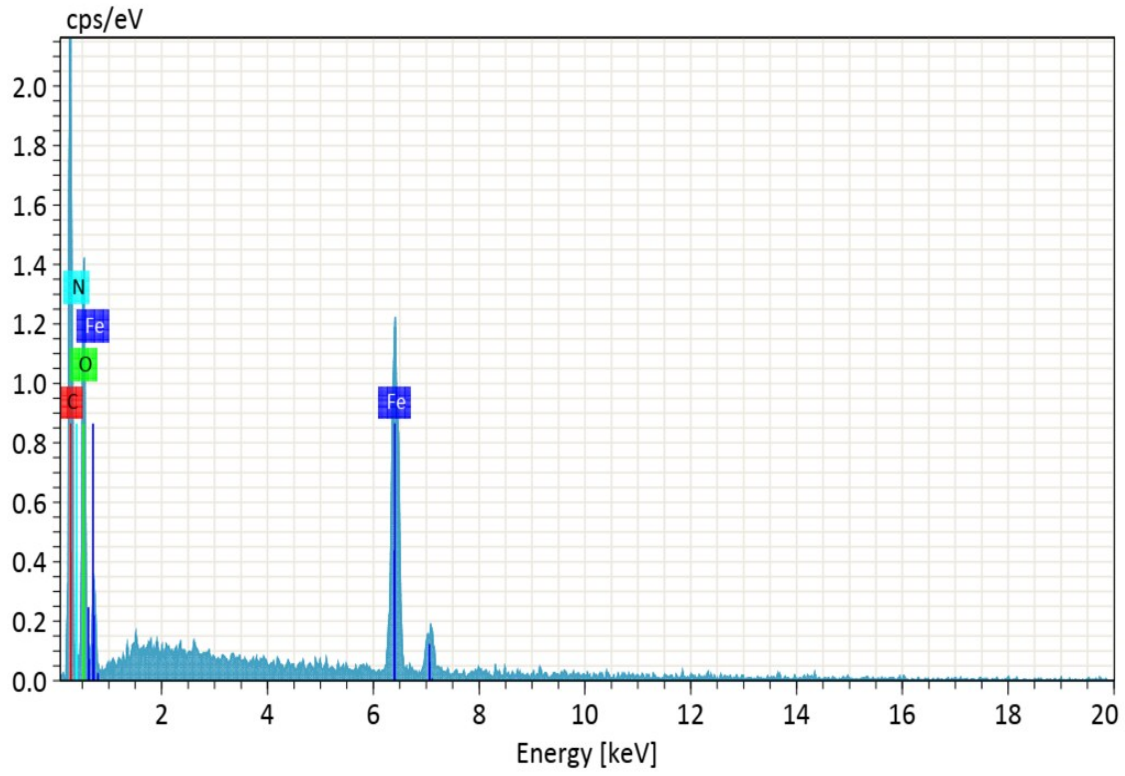

Fig.S3 EDX spectra of MNMOF

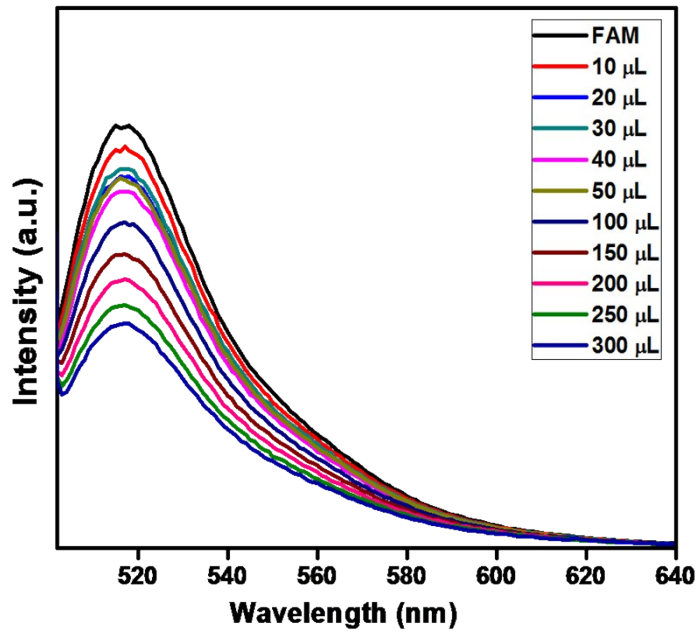

Fig.S4 Different concentration of NMOFs with FAM-ssDNA

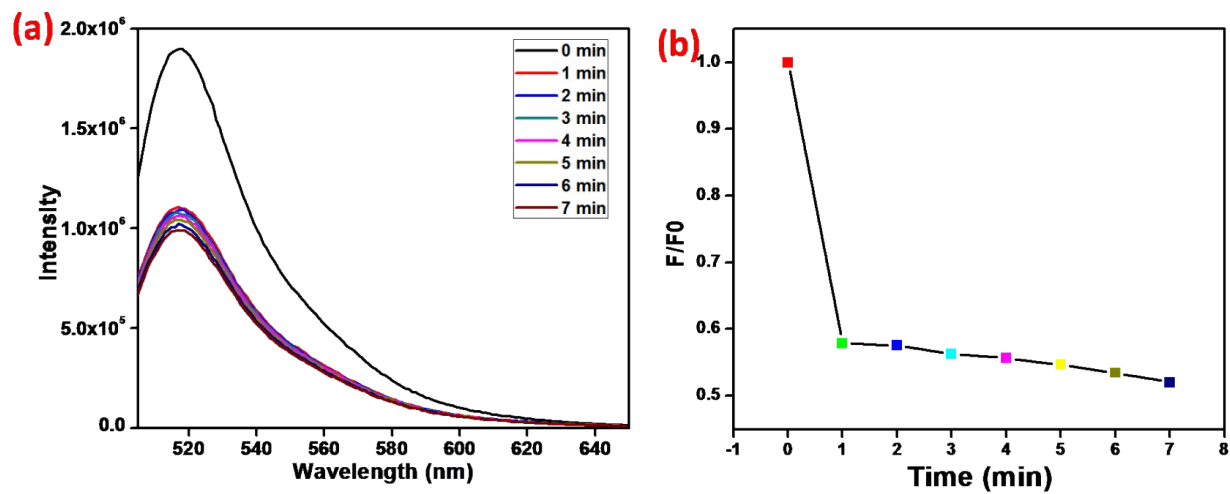

Fig.S5. Time dependent fluorescent quenching of FAM-ssDNA

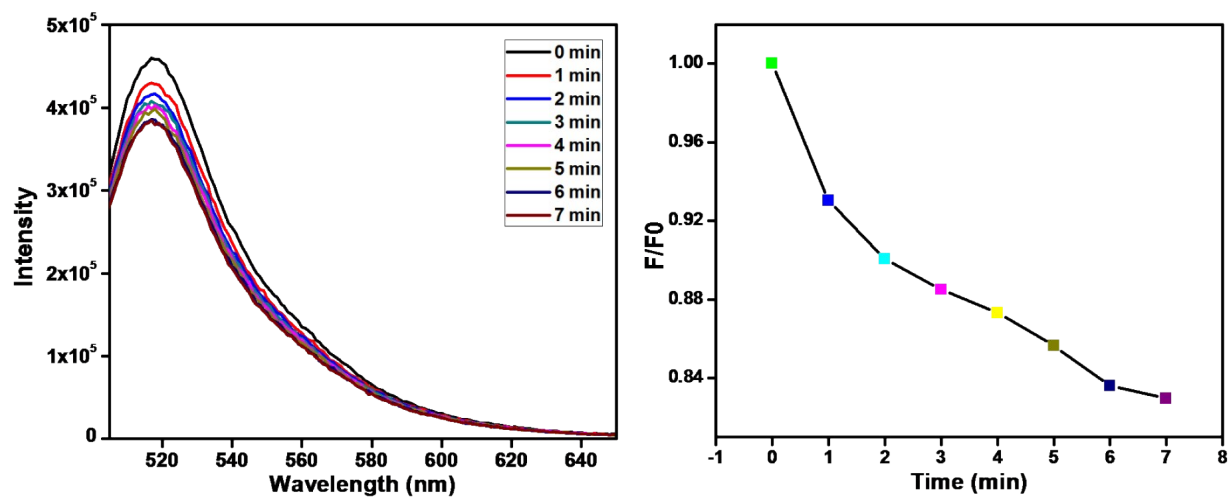

Fig.S6 Time dependent fluorescent quenching of  $Hg^{2+}$  FAM-ssDNA

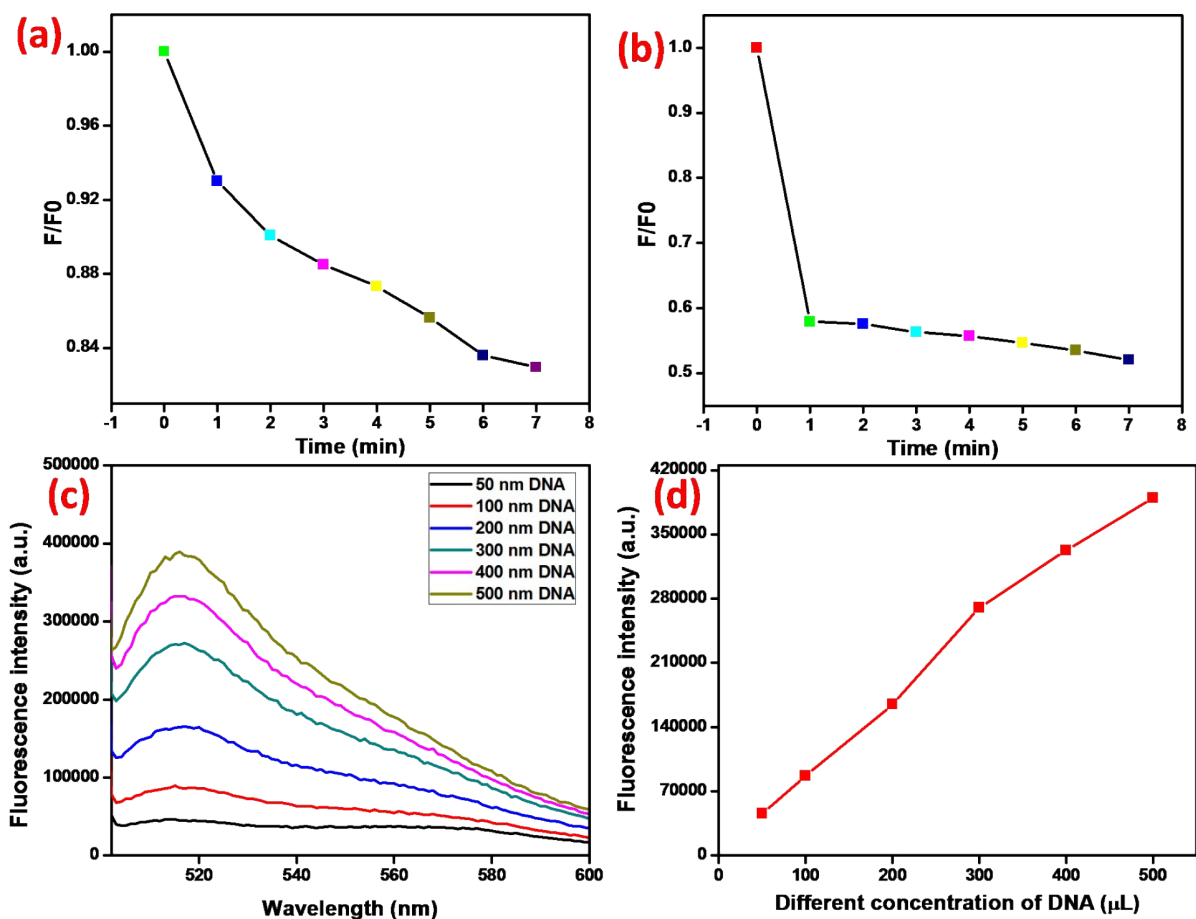

Fig.S7 (a) adsorption of FAM-ssDNA and MNMOF, (b) adsorption of FAM-ssDNA and MNMOF+Hg<sup>2+</sup>, (c) different concentration of FAM-ssDNA into 1wt% of MNMOF, (d) the relative fluorescence intensity detection of adsorption of FAM-ssDNA with MNMOF.

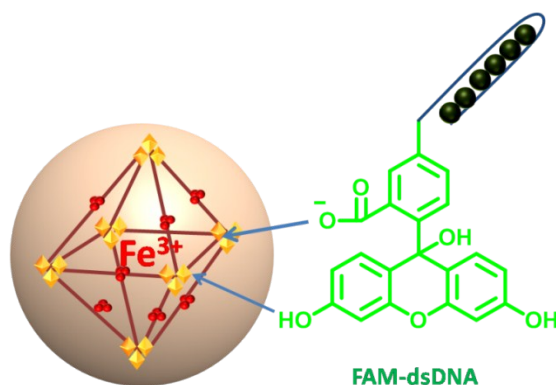

Fig.S8 illustration of FAM-ssDNA+Hg<sup>2+</sup> with MNMOF.

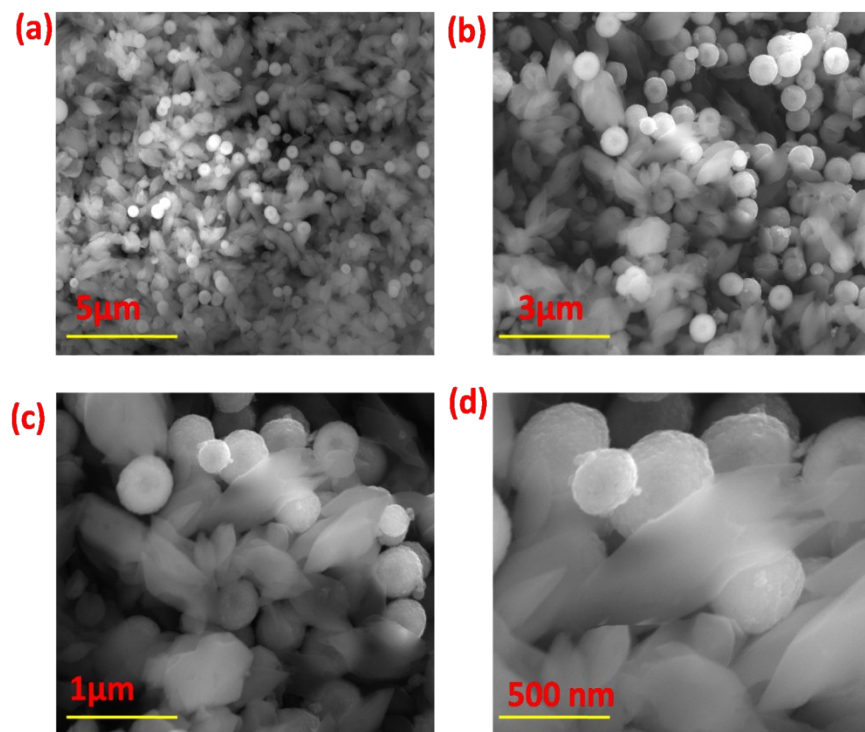

Fig. S9 SEM images with various magnitudes
